# Supplementary material
Source: PubMed Central journal article supplement (PMC7048669)
Supplement: NIHMS1048741-supplement-Supp_info.pdf [file NIHMS1048741-supplement-Supp_info.pdf]

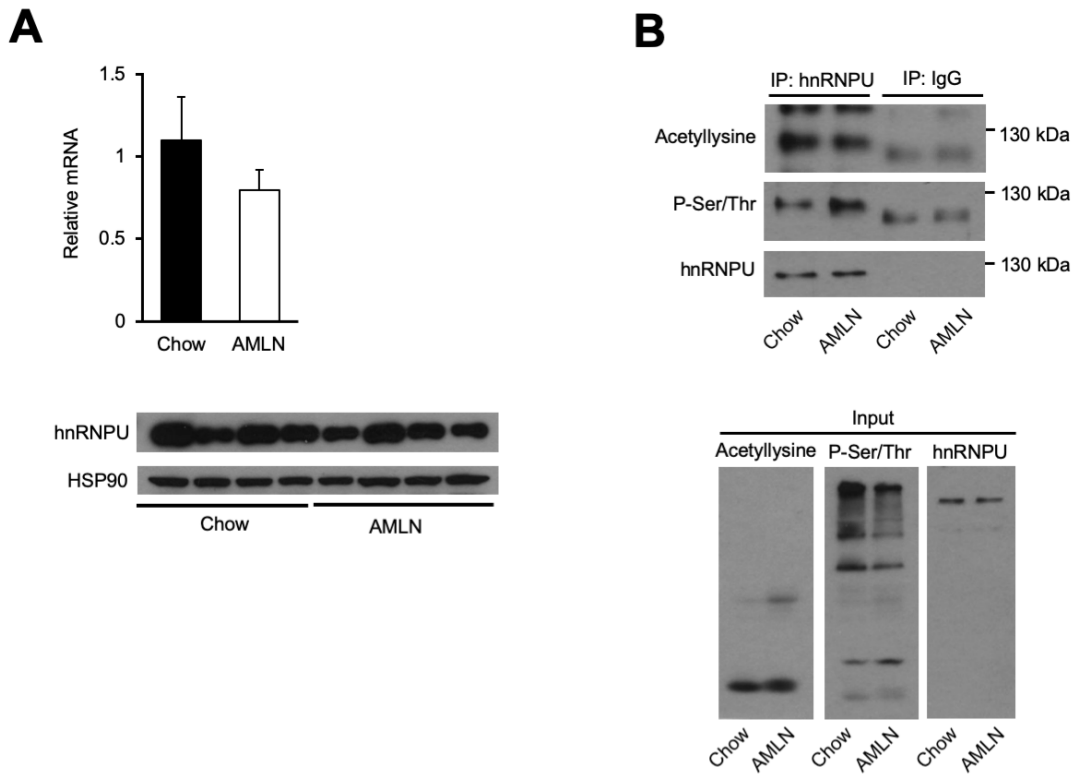

**Figure S1. Regulation of hepatic hnRNPU expression in NASH.**

(A) qPCR (top) and immunoblotting (bottom) analyses of liver hnRNPU expression in mice fed chow or AMLN NASH diet. Data represent mean  $\pm$  SEM (Chow, n=3; AMLN, n=3); two-tailed unpaired Student's *t*-test.

(B) Immunoblots of liver nuclear extracts and hnRNPU immunocomplexes from mice fed chow or AMLN NASH diet.

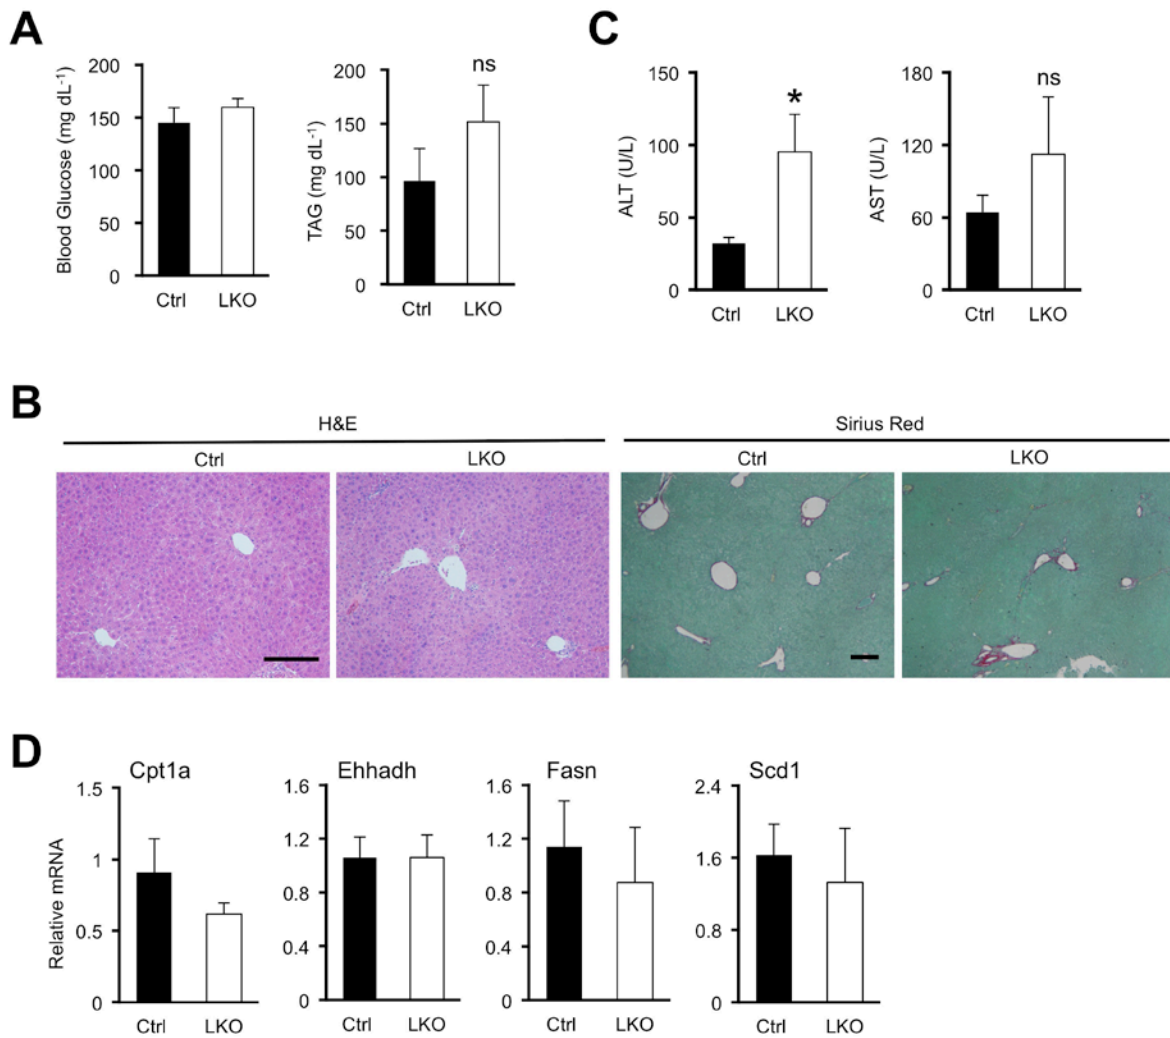

**Figure S2. Effects of liver-specific hnRNPU inactivation on chow-fed mice.**

(A) Blood glucose and plasma TAG concentrations in chow-fed Ctrl and hnRNPU LKO mice.

(B) H&E and Sirius red staining of liver sections.

(C) Plasma ALT and AST levels.

(D) qPCR analysis of hnRNPU Ctrl (n=5) or LKO (n=3) mice fed Chow diet. Data represent mean  $\pm$  SEM (Chow, n=5; AMLN, n=3). \*P<0.05; LKO vs. Ctrl, two-tailed unpaired Student's *t*-test.

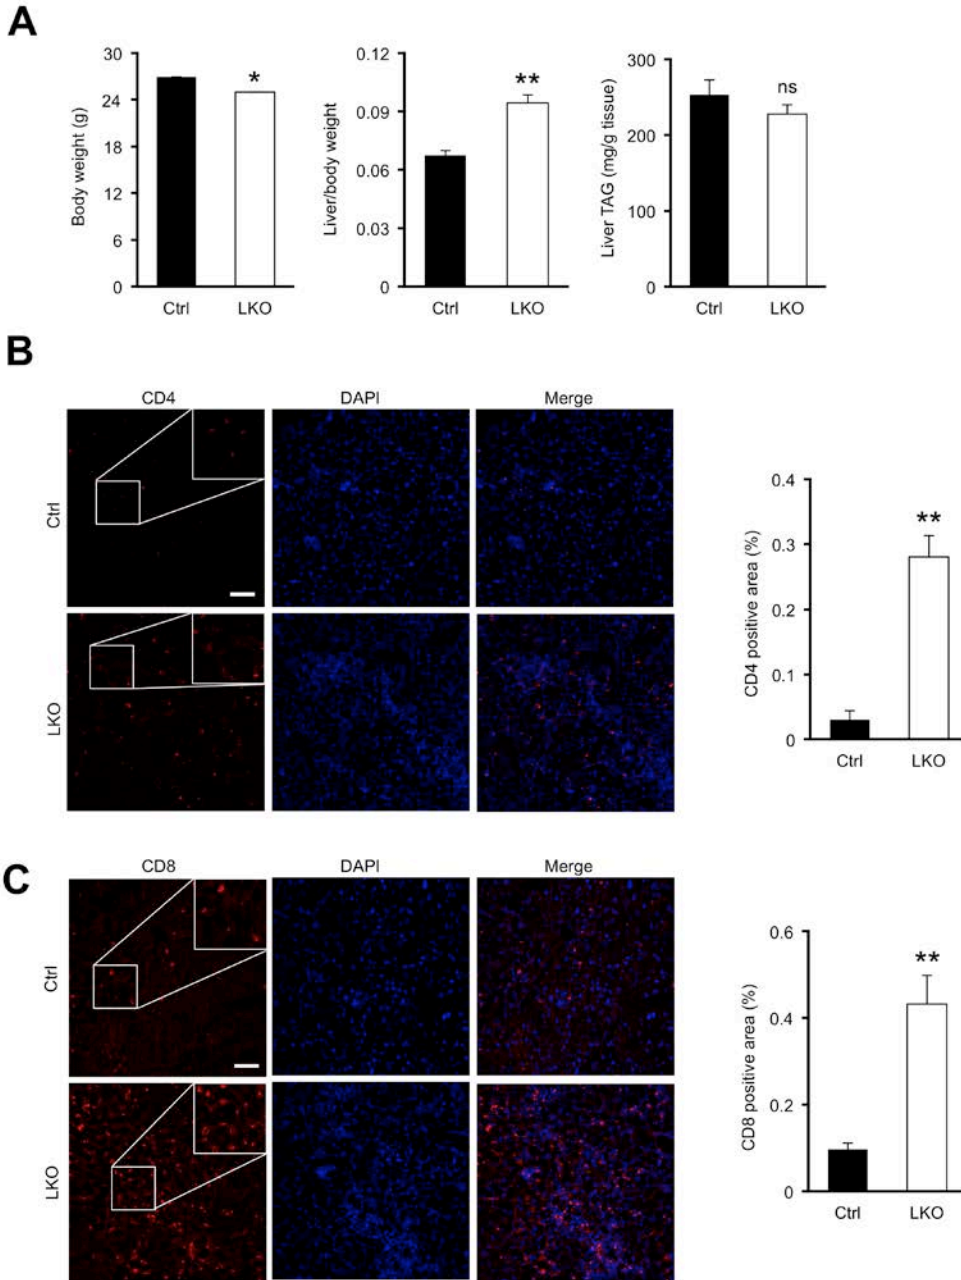

**Figure S3. Hepatocyte-specific inactivation of hnRNP-U exacerbates CDAHFD-induced NASH pathogenesis.**

(A) Metabolic parameters of Ctrl and LKO mice fed CDAHFD for 3 weeks.

(B) CD4 immunofluorescence of liver sections. Scale bars: 100  $\mu$ M.

(C) CD8 immunofluorescence of liver sections. Scale bars: 100  $\mu$ M. Data in B-C

represent mean  $\pm$  SEM (Ctrl n=8; LKO n=6). \*P<0.05, \*\*P<0.01; LKO vs. Ctrl, two-tailed unpaired Student's *t*-test.

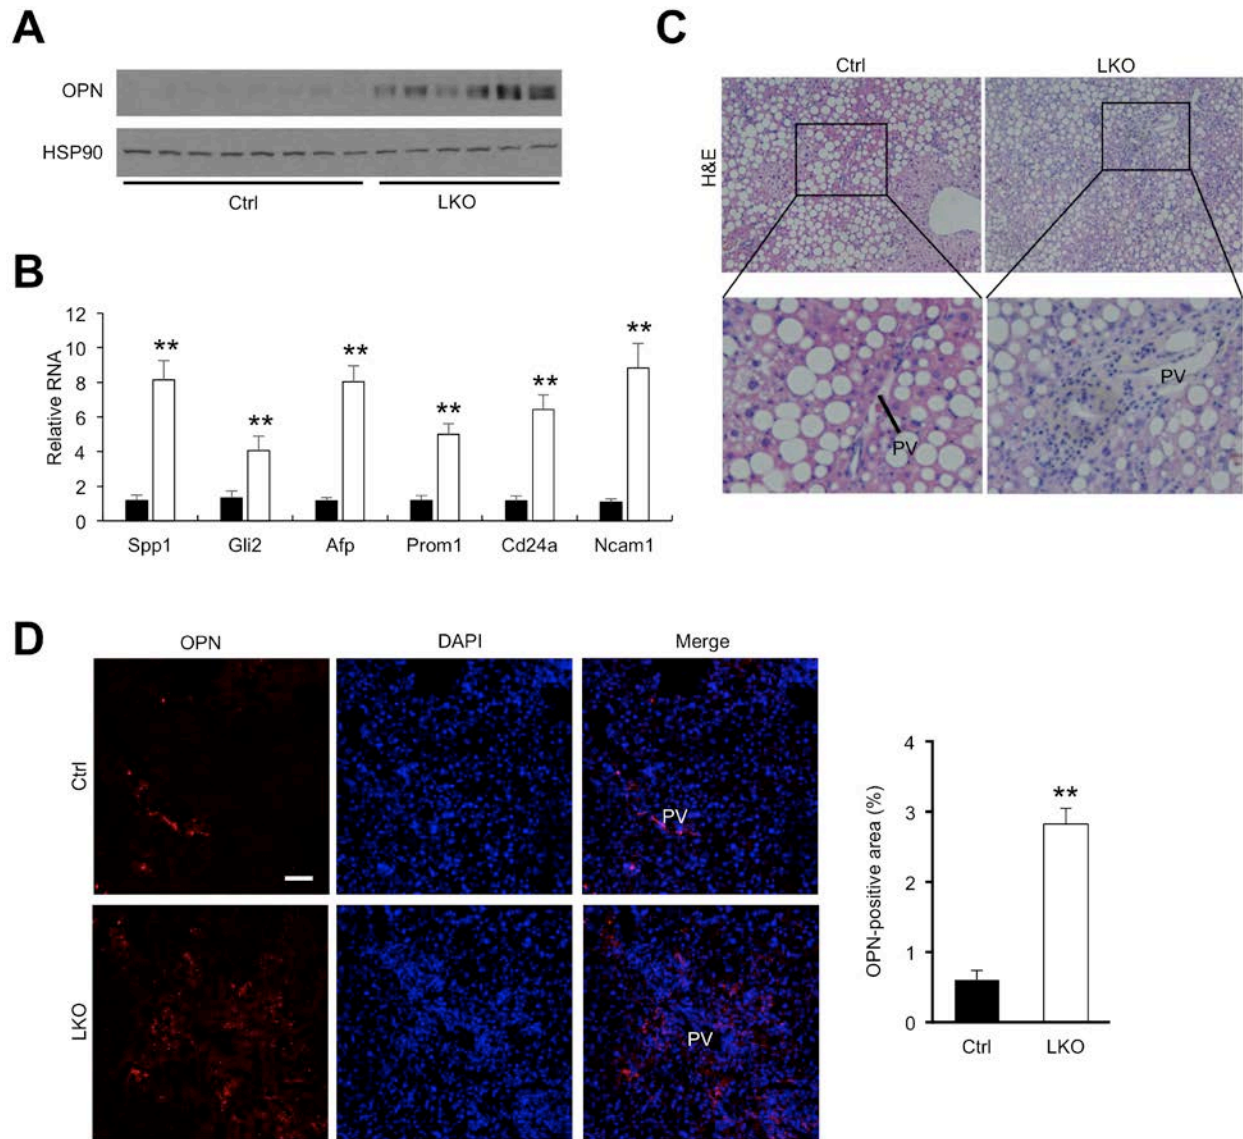

**Figure S4. Hepatocyte-specific inactivation of hnRNPU promotes ductular reaction.**

(A) Immunoblots of total liver lysates from mice fed CDAHFD for 3 weeks.

(B) qPCR analysis of hepatic gene expression.

(C) H&E staining of liver sections.

(D) OPN immunofluorescence of liver sections. Scale bars: 100  $\mu$ M. Data in (B) and (D) represent mean  $\pm$  SEM (Ctrl n=8; LKO n=6). \*\*P<0.01, LKO vs. Ctrl, two-tailed unpaired Student's *t*-test.

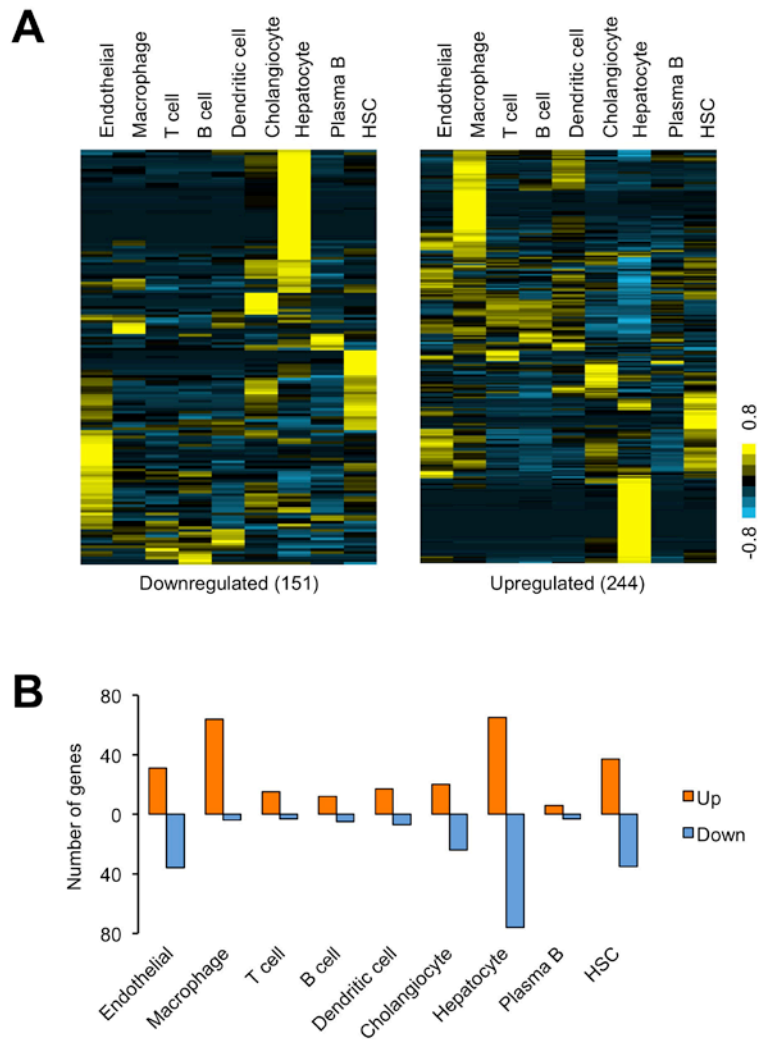

**Figure S5. hnRNPU deficiency promotes transcriptional reprogramming in multiple liver cell types.**

(A) Heat map of single cell RNA-seq data among different liver cell types for the clusters of genes upregulated or downregulated by hnRNPU inactivation.

(B) Distribution of hnRNPU-regulated genes among individual liver cell types.

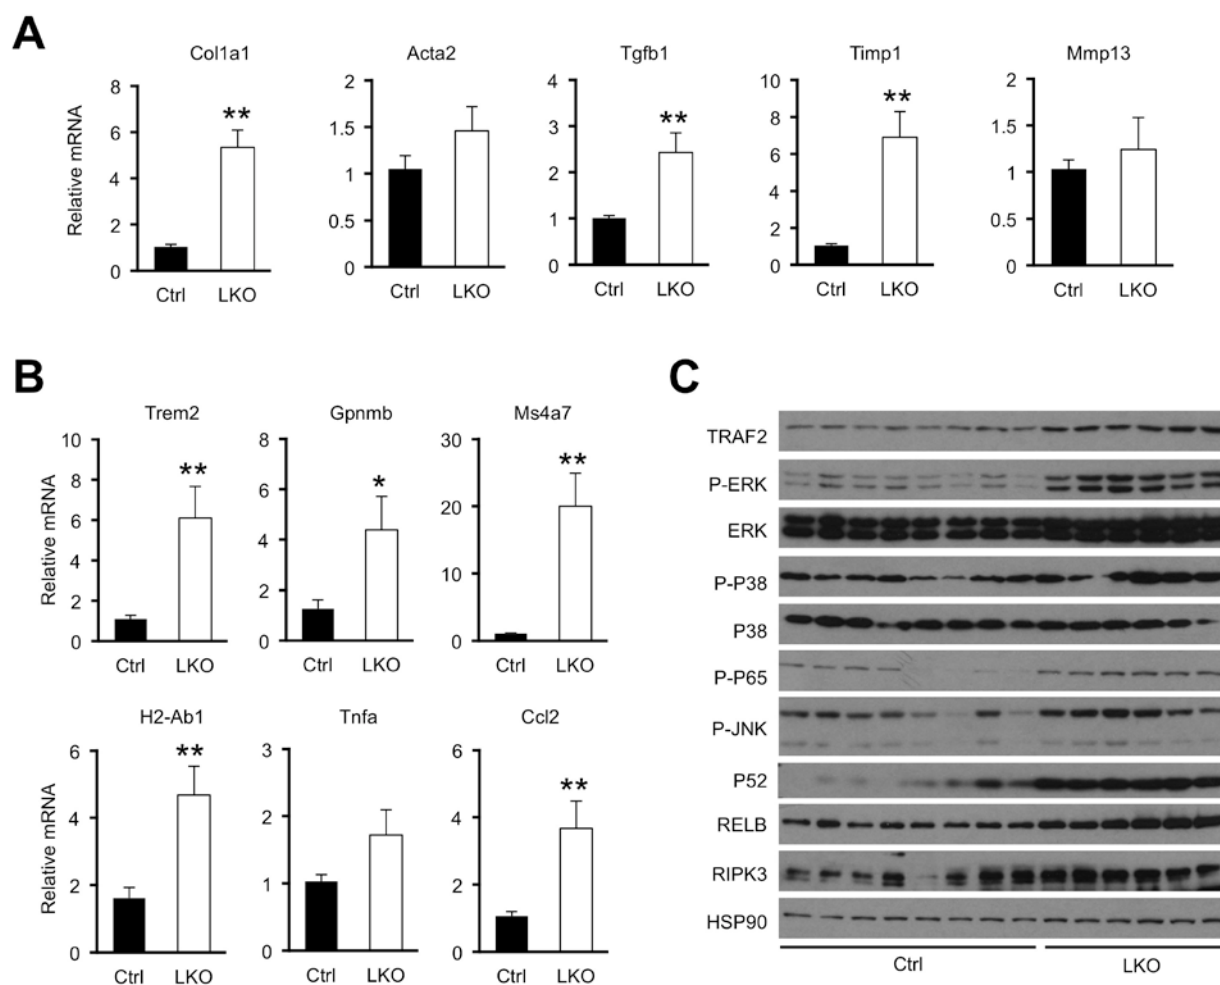

**Figure S6. Effects of hnRNPU deficiency on liver gene expression and signaling.** (A-B) qPCR analysis of hepatic gene expression in mice fed CDAHFD for 3 weeks (Ctrl n=8; LKO n=6). Data represent mean  $\pm$  SEM. \* $P$ <0.05, \*\* $P$ <0.01; Ctrl vs. LKO, two-tailed unpaired Student's  $t$ -test. (C) Immunoblots of total liver lysates from CDAHFD-fed mice.

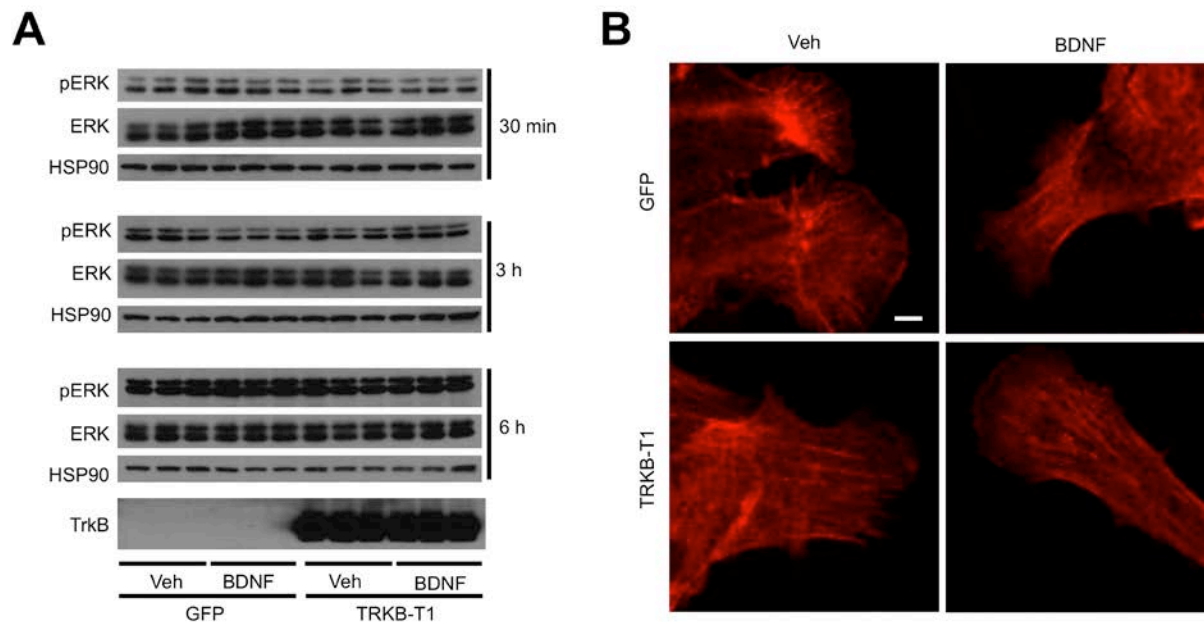

**Figure S7. Effects of BDNF on primary hepatocytes.**

(A) Immunoblots of total cell lysates from primary hepatocytes transduced with GFP or TrkB-T1 adenovirus followed by treatment with vehicle (Veh) or BDNF (100 ng/mL) for 30 minutes, 3 or 6 hrs.

(B) Phalloidin staining on transduced hepatocytes treated with Veh or BDNF for 30 minutes.



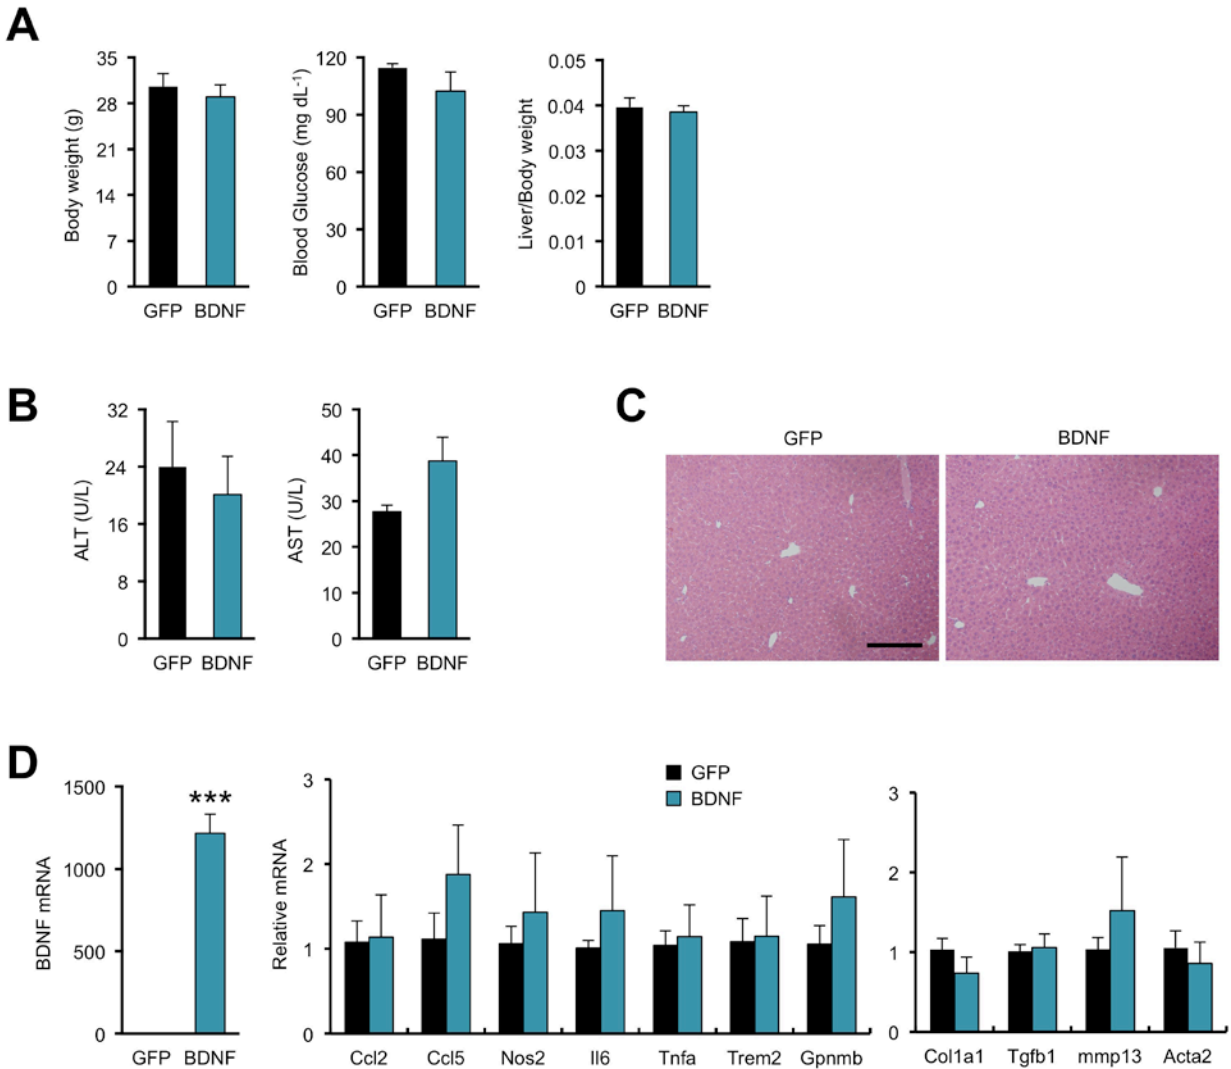

**Figure S8. Effects of hepatic BDNF overexpression in chow-fed mice.**

(A) Metabolic parameters in chow-fed mice transduced with AAV-GFP or AAV-BDNF.

(B) Plasma ALT and AST levels.

(C) H&E staining of liver sections from transduced mice.

(D) qPCR analysis of hepatic gene expression. Data in (A), (B) and (D) represent mean  $\pm$  SEM (GFP n=4; BDNF n=4). \*\*P<0.01, BDNF vs. GFP, two-tailed unpaired Student's *t*-test.



**A**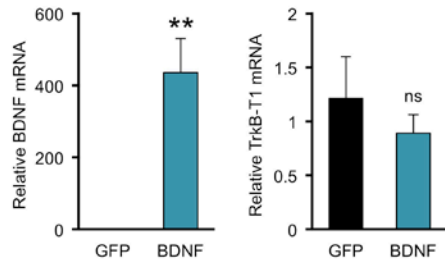**B**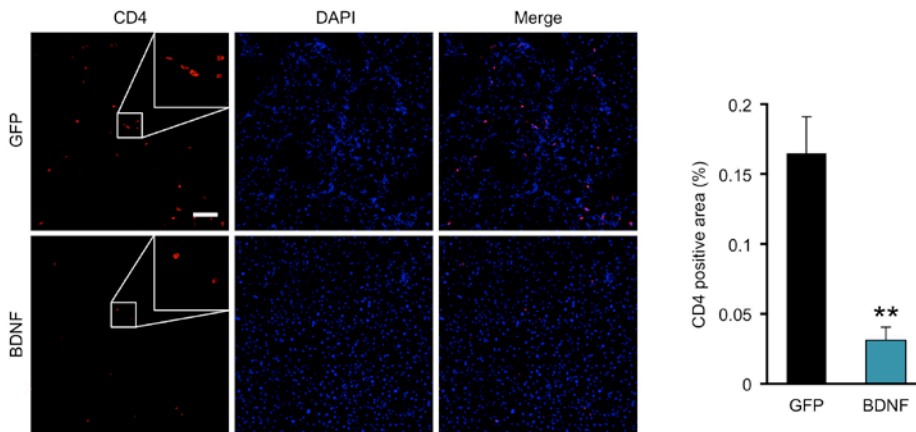**C**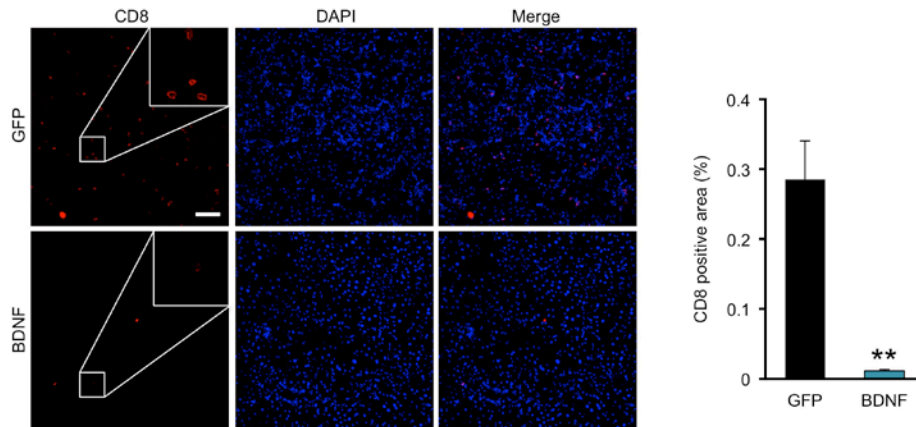

**Figure S9. Hepatic overexpression of BDNF protects NASH pathogenesis.**

(A) qPCR analysis of BDNF and TrkB-T1 expression in AMLN diet-fed mice transduced with AAV-GFP or AAV-BDNF vector (GFP n=7; BDNF n=6). \*\*P<0.01; BDNF vs. GFP, two-tailed unpaired Student's *t*-test.

(B) CD4 immunofluorescence of liver sections. Scale bars: 100  $\mu$ M.

(C) CD8 immunofluorescence of liver sections. Scale bars: 100  $\mu$ M. Data in B-C represent mean  $\pm$  SEM. \*\*P<0.01; BDNF vs. GFP, two-tailed unpaired Student's *t*-test.

| Gene         | Primers                     |                             |
|--------------|-----------------------------|-----------------------------|
|              | Forward                     | Reverse                     |
| mRplp0       | GAAACTGCTGCCTCACATCCG       | GCTGGCACAGTGACCTCACACG      |
| m t-TRKB     | <i>CCGTGGTGGTGATTGCATCT</i> | <i>CAGAGTTCAGCTCACAGGGC</i> |
| m FL-TRKB    | <i>CCCAGGGAAGAGTCCTTCAG</i> | <i>GATGTTCTTCCGGGTGTGTG</i> |
| m Total TRKB | CATTTTGCGCCAACTATCACG       | TGGCCCCATTGTAGAACCACT       |
| hRplp0       | AGGCGTCCTCGTGGAAGTGA        | GCGGATCTGCTGCATCTGCT        |
| hTRKB        | CGTGGAAGAAACGCTAATGGA       | GTACGTGCGGATCGTGTTTCAT      |
| mIifit1      | CTGAGATGTCACTTCACATGGAA     | GTGCATCCCCAATGGGTTCT        |
| mIifit3      | TCAGGCTTACGTTGACAAGGT       | CACACTTTAGGCGTGTCCATC       |
| mIifi27I2a   | CTTCCTATGCTCTGCTGCTACC      | AGCCAGAGCTCCTCCTATGG        |
| mIifih1      | TCCTGGATGTTCTGCGCCAA        | GACGAGTTAGCCAAGTCTGTGTT     |
| mC1qc        | ATGGTCGTTGGACCCAGTTG        | GGTAGGGCCAGAAGAAACAG        |
| mCd5I        | ACGGAAGCTGCAACAAGAAT        | ACTCAAAGGCAAGACCGAA         |
| mGpmb        | GAGCACAACCAATTACGTGGCT      | GGTGATATTGGAACCCACCAGA      |
| mTrem2       | CAGCACCTCCAGGAATCAAGA       | AGGATCTGAAGTTGGTGCCC        |
| mTgfb1       | ACCATGCCAACTTCTGTCTGGGAC    | ACAACTGCTCCACCTTGGGCTTG     |
| mTimp1       | CACCCACAGACGGCCTTCT         | TCTGGTGTCACCACGAACTT        |
| mCol1a1      | AAGAGGCGAGAGAGGTTTCC        | AGAACCATCAGCACCTTTGG        |
| mMmp13       | TGCTTCCTGATGATGACGTTCAAGG   | TGGGATGCTTAGGGTTGGGGTC      |
| mActa2       | CTGACAGAGGCACCACTGAA        | CATCTCCAGAGTCCAGCACACA      |
| mMs4a7       | TGAGTTCTCCCAGGAGCAGA        | CCAGGGATGCTGTCCTCAC         |
| mTnfa        | AGCCCCAGTCTGTATCCTT         | CTCCCTTTGCAGAACTCAGG        |
| mCcl2        | AGGTCCCTGTCATGCTTCTG        | TCTGGACCCATTCTTCTTG         |
| mH2-Ab1      | AGCCCCATCACTGTGGAGT         | GATGCCGCTCAACATCTTGC        |
| mIi1b        | TGGCAACTGTTCTGAACTCAA       | AGCAGCCCTTCATCTTTTGG        |
| mNos2        | GAGGCCAGGAGGAGAGATCCG       | TCCATGCAGACAACCTTGGTGTTG    |

| <b>Antibodies</b>                 | <b>Source</b>                | <b>Identifier</b> |
|-----------------------------------|------------------------------|-------------------|
| <b>Cleaved caspase 3</b>          | Cell Signaling Technology    | #9661             |
| <b>Phospho-ERK</b>                | Cell Signaling Technology    | #4370             |
| <b>Total ERK</b>                  | Cell Signaling Technology    | #4695             |
| <b>Phospho-P65</b>                | Cell Signaling Technology    | #3033             |
| <b>Total P65</b>                  | Cell Signaling Technology    | #8242             |
| <b>P52</b>                        | Cell Signaling Technology    | #4882             |
| <b>Phospho-JNK1/2 (T183/Y185)</b> | Cell Signaling Technology    | #4668             |
| <b>Total JNK1/2</b>               | Cell Signaling Technology    | #9252             |
| <b>Phospho-IKKa/b</b>             | Cell Signaling Technology    | #2697             |
| <b>Phospho-MLKL (S358)</b>        | Cell Signaling Technology    | #91689            |
| <b>TRAF2</b>                      | Cell Signaling Technology    | #4712             |
| <b>NIK</b>                        | Cell Signaling Technology    | #4994             |
| <b>RelB</b>                       | Cell Signaling Technology    | #4922             |
| <b>IKBa</b>                       | Cell Signaling Technology    | #4812             |
| <b>c-FLIP</b>                     | Cell Signaling Technology    | #56343            |
| <b>Phospho-P38 (T180/Y182)</b>    | Cell Signaling Technology    | #9215             |
| <b>Total P38</b>                  | Cell Signaling Technology    | #9212             |
| <b>Lamin A/C</b>                  | Cell Signaling Technology    | #2032             |
| <b>pEGFR</b>                      | Cell Signaling Technology    | #3777             |
| <b>PARP</b>                       | Cell Signaling Technology    | #9542             |
| <b>RIPK3</b>                      | Novus                        | #NBP1-77299       |
| <b><math>\beta</math>-actin</b>   | Sigma-Aldrich                | A4700             |
| <b>Tubulin</b>                    | Sigma-Aldrich                | T6199             |
| <b>hnRNPU</b>                     | Santa Cruz                   | Sc-32315          |
| <b>HSP90</b>                      | Santa Cruz                   | Sc-7947           |
| <b>Osteopontin</b>                | R&D                          | AF808             |
| <b>Mouse TrkB</b>                 | R&D                          | AF1494            |
| <b>Human TrkB</b>                 | Cell Signaling Technology    | #4603             |
| <b>Acetylyine</b>                 | Upstate                      | 05-515            |
| <b>P-Ser/Thr</b>                  | BD Transduction Laboratories | 612546            |
| <b>BDNF</b>                       | Abcam                        | #ab108319         |
| <b>DCN</b>                        | R&D                          | AF1060            |
| <b>F4/80</b>                      | Bio-Rad                      | MCA497G           |
| <b>CD4</b>                        | Thermo Fisher                | 14-0042-82        |
| <b>CD8a</b>                       | Thermo Fisher                | 14-0808-82        |
